# Supplementary material
Source: PubMed Central journal article supplement (PMC3156658)
Supplement: neo1308_0676SD1.pdf [file neo1308_0676SD1.pdf]

**Table W1.** Clinicopathologic Characteristics and *EHMT2* Expression.

| Tissue | Sample Name | EHMT2  | Stage | Grade |
|--------|-------------|--------|-------|-------|
| Tumor  | BT2         | 38.154 | T4    | 3     |
|        | BT5         | 7.597  | Ta    |       |
|        | BT6         | 2.488  | Ta    | 2     |
|        | BT8         | 0.809  | Ta    | 2     |
|        | BT9         | 0.021  | Ta    | 2     |
|        | BT10        | 9.196  | T2    | 3     |
|        | BT15        | 3.718  | T2    | 3     |
|        | BT16        | 2.943  | Ta    | 2     |
|        | BT18        | 8.825  | Ta    | 3     |
|        | BT20        | 0.305  | T1    | 2     |
|        | BT21        | 4.680  | Ta    | 3     |
|        | BT22        | 18.100 | T2    | 2     |
|        | BT23        | 7.790  | T1    | 2     |
|        | BT27        | 2.243  | T3    | 3     |
|        | BT28        | 22.929 | Ta    | 1     |
|        | BT31        | 7.520  | Ta    | 2     |
|        | BT32        | 1.898  | T2    | 3     |
|        | BT33        | 2.310  | T1    | 2     |
|        | BT34        | 2.800  | Ta    | 2     |
|        | BT36        | 0.963  | T2    | 3     |
|        | BT38        | 7.842  | Ta    | 2     |
|        | BT39        | 0.302  | T1    | 3     |
|        | BT40        | 1.259  | T2    | 3     |
|        | BT41        | 0.633  | T1    | 2     |
|        | BT42        | 0.644  | T2    | 3     |
|        | BT43        | 2.295  | Ta    | 1     |
|        | BT44        | 0.481  | T1    | 2     |
|        | BT46        | 4.627  | Ta    | 2     |
|        | BT48        | 8.698  | T2    | 3     |
|        | BT49        | 5.598  | Ta    | 1     |
|        | BT50        | 10.781 | T1    | 3     |
|        | BT51        | 31.680 | Ta    | 2     |
|        | BT52        | 2.046  | T3    | 3     |
|        | BT53        | 9.685  | Ta    | 2     |
|        | BT54        | 0.722  | T1    | 3     |
|        | BT56        | 16.182 | T2    | 3     |
|        | BT57        | 1.752  | T1    | 2     |
|        | BT58        | 9.347  | Ta    | 2     |
|        | BT59        | 0.662  | T2    | 3     |
|        | BT60        | 3.617  | Mets  | 3     |
|        | BT64        | 1.602  | Ta    | 2     |
|        | BT66        | 2.831  | Ta    | 1     |
|        | BT67        | 0.402  | T1    | 2     |
|        | BT68        | 4.220  | Ta    | 2     |
|        | BT69        | 10.400 | Ta    | 2     |
|        | BT70        | 3.590  | T1    | 2     |
|        | BT71        | 2.750  | T1    | 3     |
|        | BT72        | 27.900 | Ta    | 1     |
|        | BT74        | 12.300 | Ta    | 1     |
|        | BT76        | 2.730  | T1    | 1     |
|        | BT77        | 4.420  | Ta    | 2     |
|        | BT78        | 1.629  | T1    | 3     |
|        | BT79        | 0.921  | Ta    | 2     |
|        | BT80        | 2.485  | Ta    | 2     |
|        | BT81        | 2.243  | Ta    | 2     |
|        | BT82        | 1.629  | T1    | 3     |
|        | BT83        | 0.921  | Ta    | 2     |
|        | BT84        | 27.809 | Ta    | 2     |
|        | BT85        | 1.874  | T1    | 2     |
|        | BT87        | 2.045  | T2    | 2     |
|        | BT88        | 12.620 | T1    | 3     |
|        | BT90        | 4.001  | Ta    | 2     |
|        | BT92        | 3.184  | T1    | 2     |
|        | BT93        | 1.557  | T2    | 3     |
|        | BT94        | 3.563  | Ta    | 1     |
|        | BT95        | 1.111  | T3a   | 3     |
|        | BT96        | 2.485  | Ta    | 1     |
|        | BT97        | 0.192  | Ta    | 2     |
|        | BT98        | 2.121  | Ta    | 2     |
|        | BT99        | 2.078  | T1    | 2     |
|        | BT100       | 53.775 | T1    | 3     |
|        | BT101       | 5.750  | T2    | 3     |
|        | BT103       | 3.240  | T1    | 2     |

**Table W1.** (continued).

| Tissue | Sample Name | EHMT2  | Stage  | Grade  |        |
|--------|-------------|--------|--------|--------|--------|
|        | BT105       | 0.514  | T2     | 2      |        |
|        | BT106       | 1.300  | Ta     | 3      |        |
|        | BT107       | 1.570  | Mets   | 3      |        |
|        | BT108       | 0.027  | T1     | 2      |        |
|        | BT109       | 27.900 | Ta     | 2      |        |
|        | BT110       | 0.703  | T1     | 2      |        |
|        | BT112       | 92.800 | Ta     | 3      |        |
|        | BT113       | 0.984  | T1     | 3      |        |
|        | BT114       | 1.910  | T2     | 3      |        |
|        | BT115       | 1.800  | T1     | 3      |        |
|        | BT116       | 2.160  | T2a    | 3      |        |
|        | BT119       | 0.788  | Ta     | 2      |        |
|        | BT120       | 2.670  | Ta     | 2      |        |
|        | BT122       | 1.980  | T1     | 3      |        |
|        | BT125       | 1.970  | T1     | 2      |        |
|        | BT127       | 9.672  | T1     | 2      |        |
|        | BT128       | 6.160  | Ta     | 1      |        |
|        | BT129       | 0.576  | Ta     | 2      |        |
|        | BT130       | 7.240  | Ta     | 2      |        |
|        | BT131       | 1.574  | T2     | 3      |        |
|        | BT132       | 0.908  | T2     | 3      |        |
|        | BT133       | 1.367  | T1     | 2      |        |
|        | BT135       | 1.419  | T2     | 3      |        |
|        | BT137       | 0.221  | Ta     | 2      |        |
|        | BT138       | 2.925  | Ta     | 1      |        |
|        | BT139       | 1.194  | T2     | 3      |        |
|        | BT140       | 5.000  | Ta     | 2      |        |
|        | BT141       | 1.310  | Mets   | 3      |        |
|        | BT143       | 1.550  | T1     | 3      |        |
|        | BT145       | 1.320  | T2     | 2      |        |
|        | BT150       | 0.854  | Ta     | 2      |        |
|        | BT151       | 0.964  | Ta     | 3      |        |
|        | BT152       | 10.261 | Ta     | 2      |        |
|        | BT154       | 3.450  | T1     | 3      |        |
|        | BT158       | 10.420 | Ta     | 2      |        |
|        | BT160       | 0.780  | T1     | 2      |        |
|        | BT161       | 3.190  | Ta     | 2      |        |
|        | BT164       | 1.477  | Ta     | 1      |        |
|        | BT169       | 5.186  | T2     | 3      |        |
|        | BT178       | 2.940  | Ta     | 2      |        |
|        | BT180       | 0.955  | T1     | 2      |        |
|        | BT181       | 0.749  | T2     | 3      |        |
|        | BT187       | 2.364  | Ta     | 2      |        |
|        | BT188       | 18.595 | T2     | 3      |        |
|        | BT189       | 4.517  | T1     | 2      |        |
|        | Normal      | BN11A  | 1.142  | Normal | Normal |
|        |             | BN11B  | 1.494  | Normal | Normal |
|        |             | BN12A  | 1.858  | Normal | Normal |
|        |             | BN13A  | 0.601  | Normal | Normal |
|        |             | BN13B  | 0.962  | Normal | Normal |
|        |             | BN14A  | 1.216  | Normal | Normal |
|        |             | BN14B  | 0.677  | Normal | Normal |
|        |             | BN15A  | 0.693  | Normal | Normal |
|        |             | BN17B  | 0.533  | Normal | Normal |
|        |             | BN18   | 3.260  | Normal | Normal |
|        |             | BN18B  | 9.540  | Normal | Normal |
|        |             | BN19A  | 0.765  | Normal | Normal |
|        |             | BN1A   | 0.863  | Normal | Normal |
|        |             | BN20B  | 0.900  | Normal | Normal |
|        |             | BN21A  | 0.955  | Normal | Normal |
|        |             | BN22A  | 1.157  | Normal | Normal |
|        |             | BN22B  | 0.876  | Normal | Normal |
|        |             | BN24B  | 0.881  | Normal | Normal |
|        |             | BN25A  | 0.765  | Normal | Normal |
|        |             | BN26A  | 1.350  | Normal | Normal |
|        | BN2A        | 1.840  | Normal | Normal |        |
|        | BN2B        | 1.091  | Normal | Normal |        |
|        | BN4A        | 1.151  | Normal | Normal |        |
|        | BN4B        | 0.835  | Normal | Normal |        |
|        | BN5B        | 0.610  | Normal | Normal |        |
|        | BN6A        | 1.094  | Normal | Normal |        |
|        | BN8A        | 0.891  | Normal | Normal |        |
|        | BN9A        | 0.889  | Normal | Normal |        |

**Table W2.** siRNA Sequence.

| siRNA Name                       | Sequence                                                                              |
|----------------------------------|---------------------------------------------------------------------------------------|
| siEGFP                           | Sense: 5' GCAGCACGACUUCUUAAGTT 3'<br>Antisense: 5' CUUGAAGAAGUCGUGCUGCTT 3'           |
| siFFLuc                          | Sense: 5' GUGCGCUGCUGGUGCCAATT 3'<br>Antisense: 5' GUUGGCACCAGCAGCGCACTT 3'           |
| siNegative control<br>(cocktail) | Target #1<br>Sense: 5' AUCCGCGCGAUAGUACGUA 3'<br>Antisense: 5' UACGUACUAUCGCGCGGAU 3' |
|                                  | Target #2<br>Sense: 5' UUACGCGUAGCGUAAUACG 3'<br>Antisense: 5' CGUAUUACGCUACGCGUAA 3' |
|                                  | Target #3<br>Sense: 5' UAUUCGCGCGAUAGCGGU 3'<br>Antisense: 5' ACCGCUAUACGCGGAAUA 3'   |
| siEHMT2 #1                       | Sense: 5' GAGUUUGGCUAUGAGGCUATT 3'<br>Antisense: 5' UAGCCUCAUAGCCAAACUCTT 3'          |
| siEHMT2 #2                       | Sense: 5' GCAAUUAUUUCACCGUCGATT 3'<br>Antisense: 5' UGGCAGGUGAAAUAUUUGCTT 3'          |
| siIAH1                           | Sense: 5' CGAUUGACUUGGGAAGCGATT 3'<br>Antisense: 5' UCGCUUCCCAAGUCAUUCGTT 3'          |

**Table W3.** Gene Ontology Pathway Analysis Based on the Affymetrix's Microarray Data.

| Entry ID  | Name                                                | Definition                                                                                                                                                                                                                                                                                                                                                                                                                                                                                                          | P                     |
|-----------|-----------------------------------------------------|---------------------------------------------------------------------------------------------------------------------------------------------------------------------------------------------------------------------------------------------------------------------------------------------------------------------------------------------------------------------------------------------------------------------------------------------------------------------------------------------------------------------|-----------------------|
| GO0003677 | DNA binding                                         | Interacting selectively with DNA (deoxyribonucleic acid).                                                                                                                                                                                                                                                                                                                                                                                                                                                           | $4.7 \times 10^{-6}$  |
| GO0045449 | Regulation of transcription                         | Any process that modulates the frequency, rate, or extent of the synthesis of either RNA on a template of DNA or DNA on a template of RNA.                                                                                                                                                                                                                                                                                                                                                                          | $4.0 \times 10^{-6}$  |
| GO0051726 | Regulation of cell cycle                            | Any process that modulates the rate or extent of progression through the cell cycle.                                                                                                                                                                                                                                                                                                                                                                                                                                | $3.0 \times 10^{-6}$  |
| GO0006355 | Regulation of transcription, DNA-dependent          | Any process that modulates the frequency, rate, or extent of DNA-dependent transcription.                                                                                                                                                                                                                                                                                                                                                                                                                           | $3.2 \times 10^{-5}$  |
| GO0004605 | Phosphatidate cytidylyltransferase activity         | Catalysis of the reaction: CTP + phosphatidate = diphosphate + CDP-diacylglycerol.                                                                                                                                                                                                                                                                                                                                                                                                                                  | $9.7 \times 10^{-4}$  |
| GO0031570 | DNA integrity checkpoint                            | Any cell cycle checkpoint that delays or arrests cell cycle progression in response to changes in DNA structure.                                                                                                                                                                                                                                                                                                                                                                                                    | $8.5 \times 10^{-4}$  |
| GO0000075 | Cell cycle checkpoint                               | A point in the eukaryotic cell cycle where progress through the cycle can be halted until conditions are suitable for the cell to proceed to the next stage.                                                                                                                                                                                                                                                                                                                                                        | $5.8 \times 10^{-4}$  |
| GO0051338 | Regulation of transferase activity                  | Any process that modulates the frequency, rate, or extent of transferase activity, the catalysis of the transfer of a group, e.g., a methyl group, glycosyl group, acyl group, phosphorus-containing, or other groups, from one compound (generally regarded as the donor) to another compound (generally regarded as the acceptor). Transferase is the systematic name for any enzyme of EC class 2.                                                                                                               | $3.6 \times 10^{-4}$  |
| GO0016481 | Negative regulation of transcription                | Any process that stops, prevents, or reduces the frequency, rate, or extent of transcription.                                                                                                                                                                                                                                                                                                                                                                                                                       | $2.2 \times 10^{-4}$  |
| GO0000278 | Mitotic cell cycle                                  | Progression through the phases of the mitotic cell cycle, the most common eukaryotic cell cycle, which canonically comprises four successive phases called G <sub>1</sub> , S, G <sub>2</sub> , and M and includes replication of the genome and the subsequent segregation of chromosomes into daughter cells. In some variant cell cycles, nuclear replication or nuclear division may not be followed by cell division, or G <sub>1</sub> and G <sub>2</sub> phases may be absent.                               | $1.6 \times 10^{-4}$  |
| GO0016564 | Transcription repressor activity                    | Any transcription regulator activity that prevents or downregulates transcription.                                                                                                                                                                                                                                                                                                                                                                                                                                  | $1.4 \times 10^{-4}$  |
| GO0007346 | Regulation of mitotic cell cycle                    | Any process that modulates the rate or extent of progress through the mitotic cell cycle.                                                                                                                                                                                                                                                                                                                                                                                                                           | $3.6 \times 10^{-3}$  |
| GO0045892 | Negative regulation of transcription, DNA-dependent | Any process that stops, prevents, or reduces the frequency, rate, or extent of DNA-dependent transcription.                                                                                                                                                                                                                                                                                                                                                                                                         | $3.4 \times 10^{-3}$  |
| GO0016568 | Chromatin modification                              | The alteration of DNA or protein in chromatin, which may result in changing the chromatin structure.                                                                                                                                                                                                                                                                                                                                                                                                                | $2.5 \times 10^{-3}$  |
| GO0008629 | Induction of apoptosis by intracellular signals     | Any process induced by intracellular signals that directly activates any of the steps required for cell death by apoptosis.                                                                                                                                                                                                                                                                                                                                                                                         | $2.2 \times 10^{-3}$  |
| GO0006281 | DNA repair                                          | The process of restoring DNA after damage. Genomes are subject to damage by chemical and physical agents in the environment and by free radicals or alkylating agents endogenously generated in metabolism. DNA is also damaged because of errors during its replication. A variety of different DNA repair pathways have been reported that include direct reversal, base excision repair, nucleotide excision repair, photoreactivation, bypass, double-strand break repair pathway, and mismatch repair pathway. | $1.52 \times 10^{-3}$ |
| GO0007093 | Mitotic cell cycle checkpoint                       | A signal transduction-based surveillance mechanism that ensures accurate chromosome replication and segregation by preventing progression through a mitotic cell cycle until conditions are suitable for the cell to proceed to the next stage.                                                                                                                                                                                                                                                                     | $1.05 \times 10^{-3}$ |
| GO0006350 | Transcription                                       | The synthesis of either RNA on a template of DNA or DNA on a template of RNA.                                                                                                                                                                                                                                                                                                                                                                                                                                       | $1.02 \times 10^{-3}$ |
| GO0006917 | Induction of apoptosis                              | A process that directly activates any of the steps required for cell death by apoptosis.                                                                                                                                                                                                                                                                                                                                                                                                                            | $4.2 \times 10^{-2}$  |
| GO0043065 | Positive regulation of apoptosis                    | Any process that activates or increases the frequency, rate, or extent of cell death by apoptosis.                                                                                                                                                                                                                                                                                                                                                                                                                  | $4.2 \times 10^{-2}$  |
| GO0008624 | Induction of apoptosis by extracellular signals     | Any process that activates or increases the frequency, rate, or extent of cell death by apoptosis.                                                                                                                                                                                                                                                                                                                                                                                                                  | $2.2 \times 10^{-2}$  |

**Table W4.** Expression of *SLAH1* in Cancer Tissues Analyzed by cDNA Microarray\*.

| Tissue Type                 | Case (n) | Ratio (Tumor/Normal) |             |             |              |
|-----------------------------|----------|----------------------|-------------|-------------|--------------|
|                             |          | Count < 1/2          | Count < 1/3 | Count < 1/5 | Count < 1/10 |
| Bladder cancer              | 33       | 19 (57.5%)           | 17 (51.5%)  | 15 (45.4%)  | 11 (33.3%)   |
| Breast cancer               | 41       | 27 (65.8%)           | 23 (56.0%)  | 16 (39.0%)  | 9 (21.9%)    |
| Cholangiocellular carcinoma | 25       | 17 (68.0%)           | 14 (56.0%)  | 12 (48.0%)  | 11 (44.0%)   |
| Non-small cell lung cancer  | 26       | 16 (61.5%)           | 14 (53.8%)  | 11 (42.3%)  | 9 (34.6%)    |
| Prostate cancer             | 50       | 22 (44.0%)           | 18 (36.0%)  | 15 (30.0%)  | 4 (8.0%)     |
| Small cell lung cancer      | 15       | 11 (73.3%)           | 7 (46.6%)   | 1 (6.6%)    | 0 (0.0%)     |

\*We compared the signal intensity of *SLAH1* between tumor tissues and corresponding nonneoplastic tissues derived from the same patient.

**Table W5.** Primer Sequences for Quantitative RT-PCR and ChIP Analyses.

| Gene Name                           | Primer Sequence              |
|-------------------------------------|------------------------------|
| <i>GAPDH</i> (housekeeping gene)- f | 5' GCAAATTCATGGCACCGTC 3'    |
| <i>GAPDH</i> (housekeeping gene)- r | 5' TCGCCCCACTTGATTTTGG 3'    |
| <i>SDH</i> (housekeeping gene)- f   | 5' TGGGAACAAGAGGGCATCTG 3'   |
| <i>SDH</i> (housekeeping gene)- r   | 5' CCACCACTGCATCAAATTCATG 3' |
| <i>EHMT2</i> - f1                   | 5' GGAGGAAGCTGAACTCAGGAGG 3' |
| <i>EHMT2</i> - r1                   | 5' GACTGAAGTCATCACCCACCAC 3' |
| <i>SLAH1</i> - f1                   | 5' GTTACCGCCCATTCCTCAAT 3'   |
| <i>SLAH1</i> - r1                   | 5' GACAACATGTGAGCTTTGGG 3'   |
| <i>SLAH1</i> -ChIP- f1              | 5' AGCAACGGTAGCCGAGTAG 3'    |
| <i>SLAH1</i> -ChIP- r1              | 5' TGGCCGCCGCCGCCGTTTCGC 3'  |

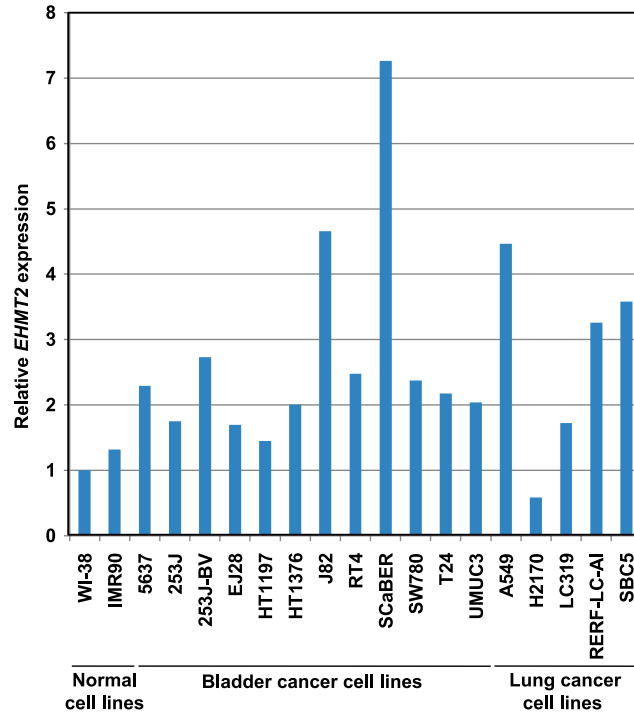

**Figure W1.** Expression of *EHMT2* in 2 normal cell lines, 12 bladder cancer cell lines, and 5 lung cancer cell lines. Expression levels of *EHMT2* were analyzed by quantitative real-time PCR. Data were normalized by *GAPDH* and *SDH* expressions.

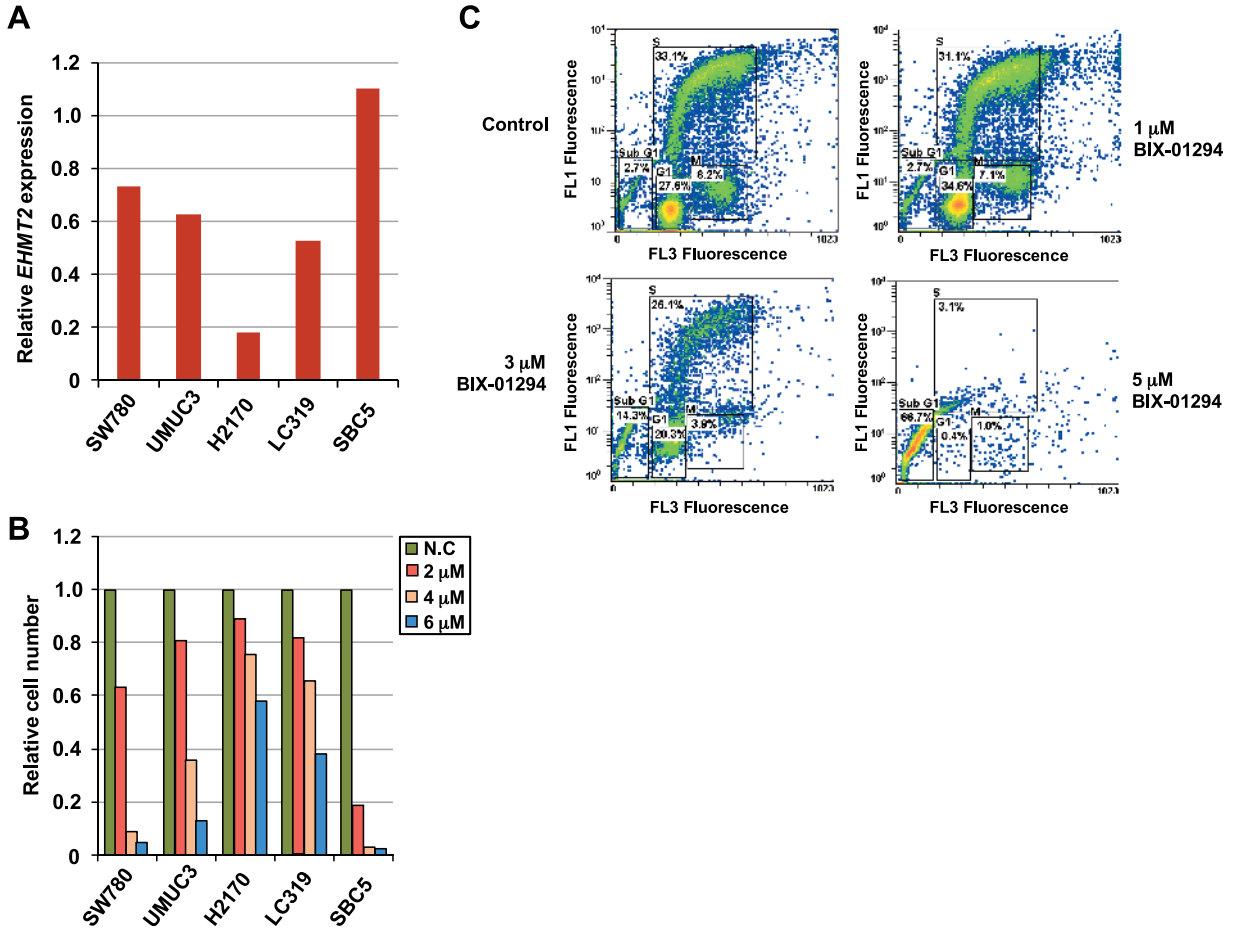

**Figure W2.** BIX-01294 reduces growth rate in five cancer cell lines. (A) Expression levels of *EHM2* in five cancer cells analyzed by quantitative real-time PCR. (B) Effect of BIX-01294 on the viability of cancer cell lines. Cancer cell lines were treated for 2 days with the inhibitor BIX-01294 (2, 4, and 6  $\mu$ M). This result was normalized by negative control (NC); pure water. Statistical analysis was done based on three independent experiments. *P* values were calculated using Student's *t* test. (C) Cell cycle distribution was analyzed by flow cytometry after coupled staining with fluorescein isothiocyanate (FITC)-conjugated anti-BrdU and 7-amino-actinomycin D (7-AAD) as described in Materials and Methods.

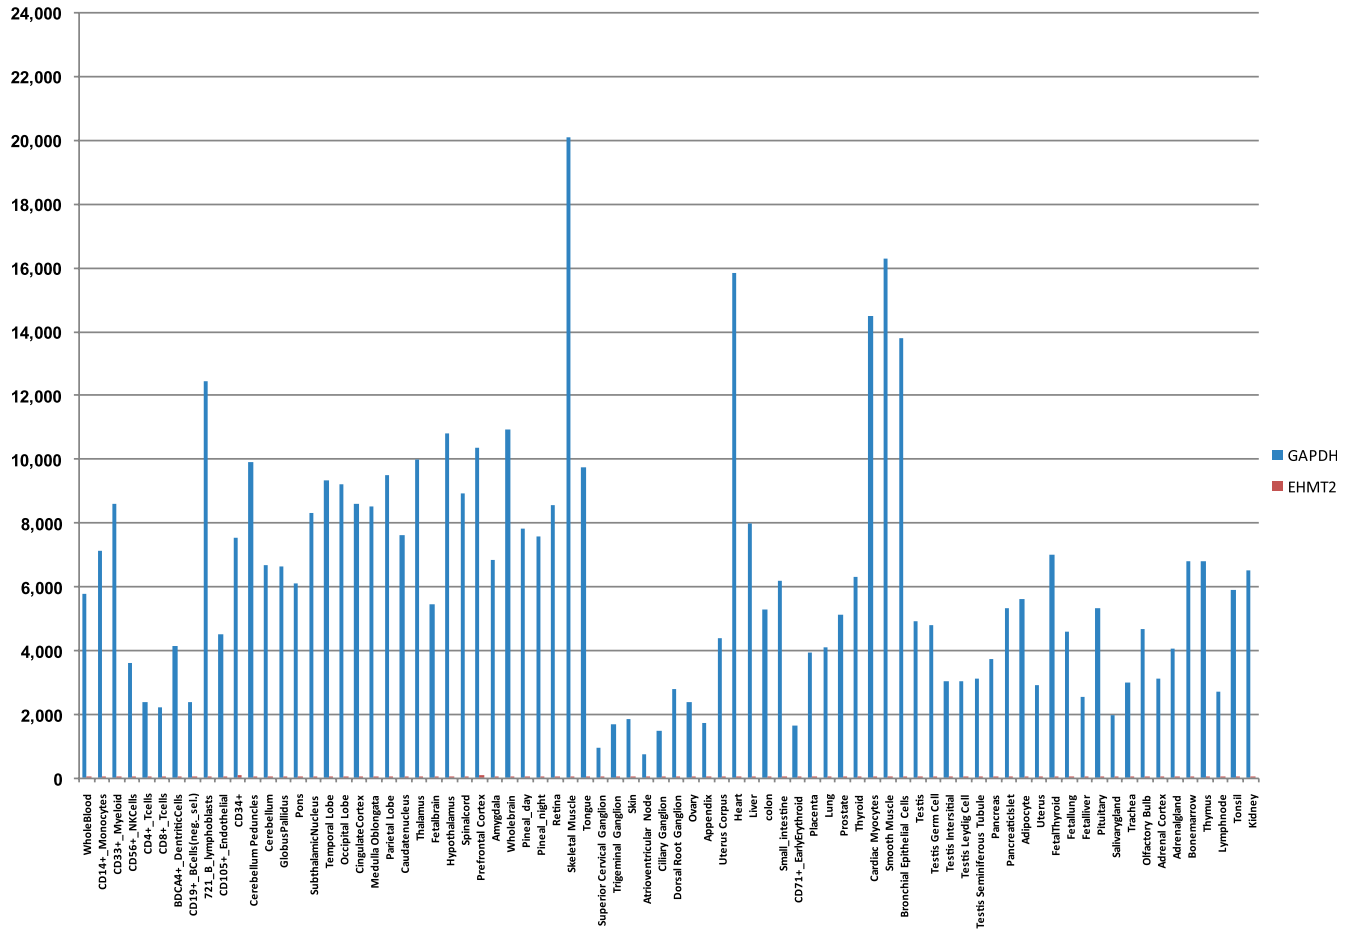

**Figure W3.** Expression levels of *EHTM2* in 78 normal tissues. Data were derived from BioGPS (<http://biogps.gnf.org/#goto=welcome>). *GAPDH* expression is shown as a control of the signal intensity.
